# Supplementary material
Source: PubMed Central journal article supplement (PMC9477798)
Supplement: 41598_2022_17368_MOESM1_ESM.pdf [file 41598_2022_17368_MOESM1_ESM.pdf]

# SARS-CoV-2 pneumonia and bacterial pneumonia patients differ in a second hit immune response model

Dominique Moser, Matthias Feuerecker, Katharina Biere, Bing Han, Marion Hoerl, Gustav Schelling, Ines Kaufmann, Alexander Choukér and Tobias Woehrle

## Supplementary Information

| Pathogen                        | SARS-P | BACT-P | BACT-S |
|---------------------------------|--------|--------|--------|
| <b>Virus</b>                    |        |        |        |
| SARS-CoV-2                      | 11     | 0      | 0      |
| <b>Gram-negative bacteria</b>   |        |        |        |
| <i>Legionella pneumophila</i>   |        | 4      | 0      |
| <i>Clamidia pneumoniae</i>      |        | 1      | 0      |
| <i>Pseudomonas aeruginosa</i>   |        | 2      | 1      |
| <i>Serratia</i>                 |        | 1      | 0      |
| <i>Escherichia coli</i>         |        | 1      | 5      |
| <i>Klebsiella</i>               |        | 1      | 2      |
| <b>Gram-positive bacteria</b>   |        |        |        |
| <i>Streptococcus pneumoniae</i> |        | 4      | 0      |
| <i>Streptococcus spp.</i>       |        | 0      | 1      |
| <i>Staphylococcus spp.</i>      |        | 2      | 0      |
| <i>Staphlococcus koag.-neg</i>  |        | 0      | 4      |
| <i>Enterococcus faecium</i>     |        | 0      | 1      |
| <i>Clostridium difficile</i>    |        | 0      | 1      |

**Supplementary Table 1.** Detected pathogens in sepsis patients with and without pneumonia.

|                                                          | SARS-P vs.<br>BACT-P        | SARS-P vs.<br>BACT-S        | BACT-P vs.<br>BACT-S    | SARS-P vs.<br>CTRL | BACT-P vs.<br>CTRL | BACT-S vs.<br>CTRL      |
|----------------------------------------------------------|-----------------------------|-----------------------------|-------------------------|--------------------|--------------------|-------------------------|
| <i>Characterization of patients and healthy controls</i> |                             |                             |                         |                    |                    |                         |
| Age (years)                                              | .456 <sup>a</sup>           | .32 <sup>a</sup>            | .107 <sup>a</sup>       | .139 <sup>a</sup>  | .566 <sup>a</sup>  | <b>.024<sup>a</sup></b> |
| BMI (kg/m <sup>2</sup> )                                 | .902 <sup>b</sup>           | .671 <sup>a</sup>           | .768 <sup>a</sup>       | .237 <sup>b</sup>  | .43 <sup>b</sup>   | .196 <sup>b</sup>       |
| PaO <sub>2</sub> /FiO <sub>2</sub> ratio day 0           | .622 <sup>b</sup>           | .223 <sup>a</sup>           | <b>.039<sup>b</sup></b> | n.a.               | n.a.               | n.a.                    |
| <b>Severity scores</b>                                   |                             |                             |                         |                    |                    |                         |
| SOFA                                                     | <b>&lt;.001<sup>a</sup></b> | <b>.009<sup>b</sup></b>     | .439 <sup>b</sup>       | n.a.               | n.a.               | n.a.                    |
| APACHE II                                                | <b>.023<sup>b</sup></b>     | <b>.021<sup>a</sup></b>     | .79 <sup>a</sup>        | n.a.               | n.a.               | n.a.                    |
| <b>Days</b>                                              |                             |                             |                         |                    |                    |                         |
| ventilated                                               | .374 <sup>b</sup>           | <b>.008<sup>b</sup></b>     | <b>.011<sup>b</sup></b> | n.a.               | n.a.               | n.a.                    |
| on ICU                                                   | .863 <sup>b</sup>           | <b>.032<sup>b</sup></b>     | <b>.013<sup>b</sup></b> | n.a.               | n.a.               | n.a.                    |
| in hospital                                              | .855 <sup>a</sup>           | .954 <sup>b</sup>           | .725 <sup>b</sup>       | n.a.               | n.a.               | n.a.                    |
| <i>Blood counts</i>                                      |                             |                             |                         |                    |                    |                         |
| Leukocytes (cells/μl)                                    | .208 <sup>b</sup>           | .183 <sup>b</sup>           | .644 <sup>a</sup>       | n.a.               | n.a.               | n.a.                    |
| Lymphocytes (cells/μl)                                   | <b>.033<sup>a</sup></b>     | .751 <sup>b</sup>           | .414 <sup>b</sup>       | n.a.               | n.a.               | n.a.                    |
| (%)                                                      | <b>.003<sup>b</sup></b>     | .066 <sup>b</sup>           | .508 <sup>b</sup>       | n.a.               | n.a.               | n.a.                    |
| Monocytes (cells/μl)                                     | .228 <sup>a</sup>           | .13 <sup>b</sup>            | .492 <sup>a</sup>       | n.a.               | n.a.               | n.a.                    |
| (%)                                                      | .765 <sup>b</sup>           | .929 <sup>a</sup>           | <b>.044<sup>b</sup></b> | n.a.               | n.a.               | n.a.                    |
| Neutrophils (cells/μl)                                   | .246 <sup>b</sup>           | .113 <sup>b</sup>           | .699 <sup>a</sup>       | n.a.               | n.a.               | n.a.                    |
| (%)                                                      | <b>.025<sup>b</sup></b>     | .307 <sup>b</sup>           | .279 <sup>b</sup>       | n.a.               | n.a.               | n.a.                    |
| Thrombocytes (×10 <sup>9</sup> /L)                       | <b>&lt;.001<sup>a</sup></b> | <b>.008<sup>a</sup></b>     | .851 <sup>a</sup>       | n.a.               | n.a.               | n.a.                    |
| Erythrocytes (×10 <sup>12</sup> /L)                      | .076 <sup>a</sup>           | .147 <sup>a</sup>           | .509 <sup>b</sup>       | n.a.               | n.a.               | n.a.                    |
| Hemoglobin (g/dl)                                        | .288 <sup>b</sup>           | .13 <sup>a</sup>            | .174 <sup>b</sup>       | n.a.               | n.a.               | n.a.                    |
| PCT (ng/ml)                                              | <b>&lt;.001<sup>b</sup></b> | <b>&lt;.001<sup>b</sup></b> | .336 <sup>b</sup>       | n.a.               | n.a.               | n.a.                    |
| CRP (mg/dl)                                              | .104 <sup>a</sup>           | .888 <sup>a</sup>           | .051 <sup>a</sup>       | n.a.               | n.a.               | n.a.                    |
| IL-6 (pg/ml)                                             | <b>.036<sup>b</sup></b>     | <b>.001<sup>b</sup></b>     | .119 <sup>b</sup>       | n.a.               | n.a.               | n.a.                    |

**Supplementary Table 2.** Results of statistical analyses *Characterization of patients and healthy controls* between all cohorts; <sup>a</sup>two-tailed unpaired Student's *t*-test, <sup>b</sup>Mann–Whitney-*U* test.

|                                                         |                 | SARS-P vs.<br>BACT-P | SARS-P vs.<br>BACT-S | BACT-P vs.<br>BACT-S | SARS-P vs.<br>CTRL | BACT-P vs.<br>CTRL | BACT-S vs.<br>CTRL |
|---------------------------------------------------------|-----------------|----------------------|----------------------|----------------------|--------------------|--------------------|--------------------|
| <i>Cytokine concentrations</i>                          |                 |                      |                      |                      |                    |                    |                    |
| <i>Negative control samples</i>                         |                 |                      |                      |                      |                    |                    |                    |
| <b>IL-2</b>                                             | day 0           | n.a.                 | n.a.                 | .967 <sup>b</sup>    | n.a.               | .24 <sup>b</sup>   | .496 <sup>b</sup>  |
| <b>IFN<math>\gamma</math></b>                           | day 0           | .385 <sup>b</sup>    | .335 <sup>b</sup>    | .342 <sup>b</sup>    | .03 <sup>b</sup>   | .415 <sup>b</sup>  | .004 <sup>b</sup>  |
| <b>TNF</b>                                              | day 0           | <.001 <sup>b</sup>   | <.001 <sup>b</sup>   | .826 <sup>b</sup>    | <.001 <sup>b</sup> | .98 <sup>b</sup>   | .769 <sup>b</sup>  |
| <i>PWM stimulated samples (two-way ANOVA)</i>           |                 |                      |                      |                      |                    |                    |                    |
| <b>IL-2</b>                                             | day 0           | <.001                | <.001                | .975                 | .044               | <.001              | <.001              |
| <b>IFN<math>\gamma</math></b>                           | day 0           | <.001                | <.001                | .745                 | <.001              | <.001              | <.001              |
| <b>TNF</b>                                              | day 0           | <.001                | <.001                | .959                 | .004               | .258               | .189               |
| <i>Negative control samples over time</i>               |                 |                      |                      |                      |                    |                    |                    |
|                                                         |                 | SARS-P               | BACT-P               | BACT-S               |                    |                    |                    |
| <b>IL-2</b>                                             | day 0 vs. day 4 | .947                 | .068                 | .15                  |                    |                    |                    |
|                                                         | day 0 vs. day 7 | .947                 | .983                 | .973                 |                    |                    |                    |
|                                                         | day 4 vs. day 7 | 1                    | .068                 | .183                 |                    |                    |                    |
| <b>IFN<math>\gamma</math></b>                           | day 0 vs. day 4 | 1                    | .077                 | .191                 |                    |                    |                    |
|                                                         | day 0 vs. day 7 | .526                 | .267                 | .77                  |                    |                    |                    |
|                                                         | day 4 vs. day 7 | .62                  | .739                 | .823                 |                    |                    |                    |
| <b>TNF</b>                                              | day 0 vs. day 4 | .808                 | .952                 | .394                 |                    |                    |                    |
|                                                         | day 0 vs. day 7 | .658                 | .949                 | 1                    |                    |                    |                    |
|                                                         | day 4 vs. day 7 | .886                 | .877                 | .68                  |                    |                    |                    |
| <i>PWM stimulated samples over time (two-way ANOVA)</i> |                 |                      |                      |                      |                    |                    |                    |
|                                                         |                 | SARS-P               | BACT-P               | BACT-S               |                    |                    |                    |
| <b>IL-2</b>                                             | day 0 vs. day 4 | n.s.                 | n.s.                 | n.s.                 |                    |                    |                    |
|                                                         | day 0 vs. day 7 | n.s.                 | n.s.                 | n.s.                 |                    |                    |                    |
|                                                         | day 4 vs. day 7 | n.s.                 | n.s.                 | n.s.                 |                    |                    |                    |
| <b>IFN<math>\gamma</math></b>                           | day 0 vs. day 4 | n.s.                 | n.s.                 | n.s.                 |                    |                    |                    |
|                                                         | day 0 vs. day 7 | n.s.                 | n.s.                 | n.s.                 |                    |                    |                    |
|                                                         | day 4 vs. day 7 | n.s.                 | n.s.                 | n.s.                 |                    |                    |                    |
| <b>TNF</b>                                              | day 0 vs. day 4 | n.s.                 | n.s.                 | n.s.                 |                    |                    |                    |
|                                                         | day 0 vs. day 7 | n.s.                 | n.s.                 | n.s.                 |                    |                    |                    |
|                                                         | day 4 vs. day 7 | n.s.                 | n.s.                 | n.s.                 |                    |                    |                    |

**Supplementary Table 3.** Results of statistical analyses *Cytokine concentrations* between all cohorts; <sup>a</sup>two-tailed unpaired Student's *t*-test, <sup>b</sup>Mann–Whitney-*U* test, for multiple pairwise comparisons, two-way ANOVA and the Holm-Šídák test were applied.

|                                                       |       | <b>SARS-P</b>  | <b>BACT-P</b>  | <b>BACT-S</b>  | <b>CTRL</b>     |
|-------------------------------------------------------|-------|----------------|----------------|----------------|-----------------|
| <b>IL-2 [pg/ml]</b><br>median (IQR)                   | day 0 | < LOD          | 0.1 (0.0-0.7)  | 0.1 (0.0-1.3)  | 0.3 (0.1-1.13)  |
|                                                       | day 4 | < LOD          | < LOD          | < LOD          | n.a.            |
|                                                       | day 7 | < LOD          | 0.1 (0.0-1.5)  | 0.1 (0.0-1.2)  | n.a.            |
| <b>IFN<math>\gamma</math> [pg/ml]</b><br>median (IQR) | day 0 | 0.4 (0.40-7.3) | 3.0 (0.4-53.1) | 2.8 (0.5-6.2)  | 11.7 (3.4-16.6) |
|                                                       | day 4 | 0.4 (0.4-1.9)  | 0.4 (0.2-2.0)  | 1.5 (0.3-1.6)  | n.a.            |
|                                                       | day 7 | 0.4 (0.4 -4.2) | 0.8 (0.0-23.0) | 0.8 (0.2-16.9) | n.a.            |
| <b>TNF [pg/ml]</b><br>median (IQR)                    | day 0 | 180 (95-317)   | 0.3 (0.1-2.0)  | 0.3 (0.0-3.2)  | 0.7 (0.0-8.4)   |
|                                                       | day 4 | 166 (78-663)   | 0.5 (0.2-1.6)  | 0.3 (0.0-0.9)  | n.a.            |
|                                                       | day 7 | 194 (57-498)   | 0.6 (0.0-7.7)  | 0.4 (0.0-3.6)  | n.a.            |

**Supplementary Table 4.** Concentrations of IL-2, IFN- $\gamma$  and TNF were measured in whole blood samples obtained from patients with severe COVID-19 (SARS-P, n=12), patients with sepsis resulting from bacterial pneumonia (BACT-P, n=16), from patients with sepsis resulting from bacterial origin other than pneumonia (BACT-S, n=15) and from healthy volunteers (CTRL, n=11), after vehicle control stimulation for 48 hours on day 0, day 4 and day 7.

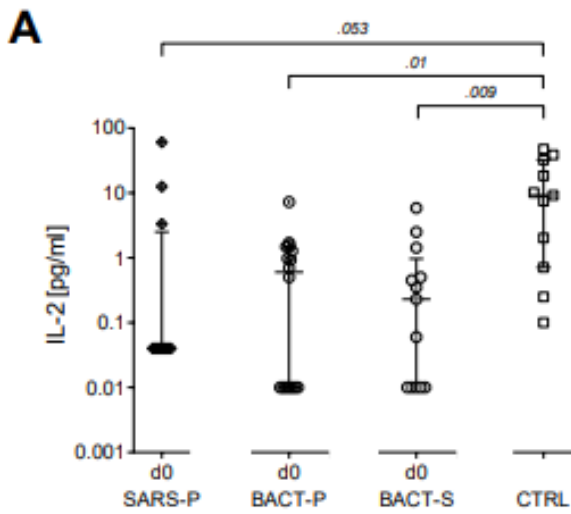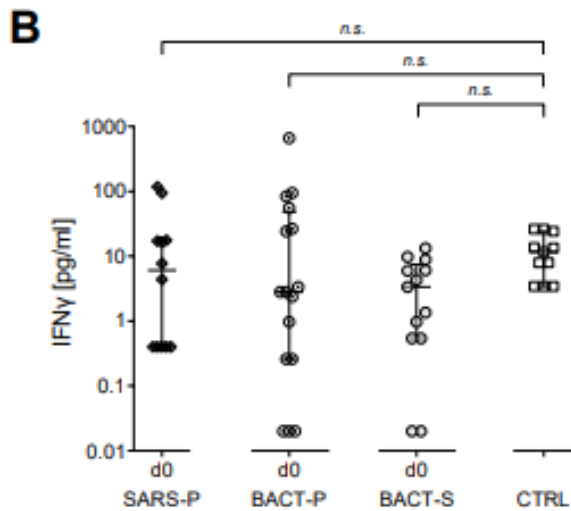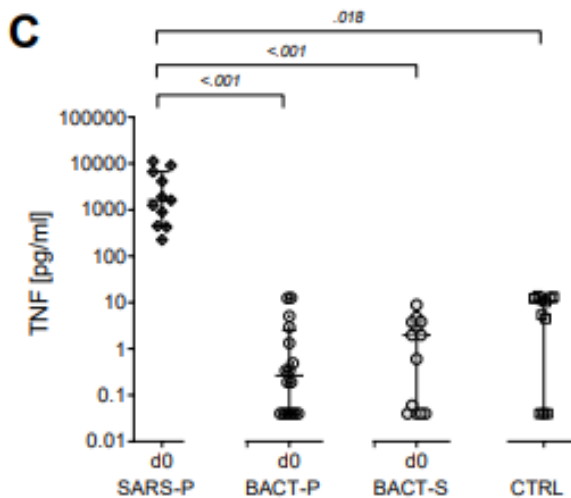

**Supplementary Figure 1. Cytokine concentrations after stimulation with *Aspergillus fumigatus* lysate.** Concentrations of IL-2 (A), IFN- $\gamma$  (B) and TNF (C) were measured in whole blood samples obtained from patients with severe COVID-19 (SARS-P, n=12), patients with sepsis resulting from bacterial pneumonia (BACT-P, d0: n=16), from patients with sepsis resulting from bacterial origin other than pneumonia (BACT-S, d0: n=13) and from healthy volunteers (CTRL, n=11), after *Aspergillus fumigatus* stimulation (10  $\mu$ g/ml) for 48 hours upon ICU admission; n.s. non-significant, data were analyzed using one-way ANOVA.
